# Supplementary material
Source: HighWire-hosted journal article supplement (https://bmjopen.bmj.com/content/11/2/e038385)
Supplement: inline-supplementary-material-1 [file inline-supplementary-material-1.pdf]

## Search strategy

### Pubmed

((splenectomies[MeSH Terms]) OR splenectomy)) AND (((Hypertension, Pulmonary[MeSH Terms]) OR pulmonary hypertension) OR chronic thromboembolic pulmonary hypertension)

### The Cochrane library

- #1 MeSH descriptor: [Hypertension, Pulmonary] explode all trees
- #2 (Chronic thromboembolic pulmonary hypertension):ti,ab,kw (Word variations have been searched)
- #3 (pulmonary hypertension):ti,ab,kw (Word variations have been searched)
- #4 MeSH descriptor: [Splenectomy] explode all trees
- #5 (splenectomies):ti,ab,kw (Word variations have been searched)
- #6 #1 OR #2 OR #3
- #7 #4 OR #5
- #8 #6 AND #7

### Embase

- #1. 'chronic thromboembolic pulmonary hypertension'/exp
- #2. 'pulmonary hypertension':ab,ti,kw
- #3. 'splenectomy'/exp
- #4. 'splenectomies':ab,ti,kw
- #5. #1 OR #2
- #6. #3 OR #4
- #7. #5 AND #6
